# Supplementary material
Source: publisher figshare collection journal article supplement (https://acs.figshare.com/ndownloader/files/4088428)
Supplement: Supplementary file 1 [file 4088428]

 
data_compound2
 
_audit_creation_method            SHELXL-97 
_chemical_name_systematic 
; 
 ? 
; 
_chemical_name_common             ? 
_chemical_melting_point           ?
_chemical_absolute_configuration  rm  
_chemical_formula_moiety        'C50 H42 N14 Ni2 O4, 7(H2 O)'
_chemical_formula_sum 
 'C50 H56 N14 Ni2 O11' 
_chemical_formula_weight          1146.51 
 
loop_ 
 _atom_type_symbol 
 _atom_type_description 
 _atom_type_scat_dispersion_real 
 _atom_type_scat_dispersion_imag 
 _atom_type_scat_source 
 'C'  'C'   0.0033   0.0016 
 'International Tables Vol C Tables 4.2.6.8 and 6.1.1.4' 
 'H'  'H'   0.0000   0.0000 
 'International Tables Vol C Tables 4.2.6.8 and 6.1.1.4' 
 'N'  'N'   0.0061   0.0033 
 'International Tables Vol C Tables 4.2.6.8 and 6.1.1.4' 
 'O'  'O'   0.0106   0.0060 
 'International Tables Vol C Tables 4.2.6.8 and 6.1.1.4' 
 'Ni'  'Ni'   0.3393   1.1124 
 'International Tables Vol C Tables 4.2.6.8 and 6.1.1.4' 
 
_symmetry_cell_setting            triclinic 
_symmetry_space_group_name_H-M    P1 
 
loop_ 
 _symmetry_equiv_pos_as_xyz 
 'x, y, z' 
 
_cell_length_a                    8.0276(7) 
_cell_length_b                    10.9031(8) 
_cell_length_c                    16.9025(13) 
_cell_angle_alpha                 71.996(7) 
_cell_angle_beta                  82.528(6) 
_cell_angle_gamma                 87.128(6) 
_cell_volume                      1394.94(19) 
_cell_formula_units_Z             1 
_cell_measurement_temperature     296(2) 
_cell_measurement_reflns_used     5335
_cell_measurement_theta_min       2.9887
_cell_measurement_theta_max       29.3184
 
_exptl_crystal_description        block 
_exptl_crystal_colour             brown 
_exptl_crystal_size_max           0.15 
_exptl_crystal_size_mid           0.13 
_exptl_crystal_size_min           0.12 
_exptl_crystal_density_meas       ? 
_exptl_crystal_density_diffrn     1.365 
_exptl_crystal_density_method     'not measured' 
_exptl_crystal_F_000              598 
_exptl_absorpt_coefficient_mu     0.744 
_exptl_absorpt_correction_type    'multi-scan' 
_exptl_absorpt_correction_T_min   0.8966 
_exptl_absorpt_correction_T_max   0.9160 
_exptl_absorpt_process_details     
;
CrysAlisPro, Oxford Diffraction Ltd.,
Version 1.171.34.40 (release 27-08-2010 CrysAlis171 .NET)
(compiled Aug 27 2010,11:50:40)
Empirical absorption correction using spherical harmonics,
 implemented in SCALE3 ABSPACK scaling algorithm.
;
 
_exptl_special_details 
; 
 ? 
; 
 
_diffrn_ambient_temperature       296(2) 
_diffrn_radiation_wavelength      0.71073 
_diffrn_radiation_type            MoK\a 
_diffrn_radiation_source          'Enhance (Mo) X-ray Source'
_diffrn_radiation_monochromator   graphite 
_diffrn_measurement_device_type   'Xcalibur, Eos, Gemini' 
_diffrn_measurement_method        '\w scans' 
_diffrn_detector_area_resol_mean  16.2312 
_diffrn_standards_number          ? 
_diffrn_standards_interval_count  ? 
_diffrn_standards_interval_time   ? 
_diffrn_standards_decay_%         ? 
_diffrn_reflns_number             10883 
_diffrn_reflns_av_R_equivalents   0.0272 
_diffrn_reflns_av_sigmaI/netI     0.0598 
_diffrn_reflns_limit_h_min        -9 
_diffrn_reflns_limit_h_max        9 
_diffrn_reflns_limit_k_min        -12 
_diffrn_reflns_limit_k_max        13 
_diffrn_reflns_limit_l_min        -20 
_diffrn_reflns_limit_l_max        20 
_diffrn_reflns_theta_min          2.99 
_diffrn_reflns_theta_max          25.50 
_reflns_number_total              8650 
_reflns_number_gt                 7363 
_reflns_threshold_expression      >2sigma(I) 
 
_computing_data_collection        
;
CrysAlisPro, Oxford Diffraction Ltd.,
Version 1.171.34.40 (release 27-08-2010 CrysAlis171 .NET)
(compiled Aug 27 2010,11:50:40)
; 
_computing_cell_refinement        
;
CrysAlisPro, Oxford Diffraction Ltd.,
Version 1.171.34.40 (release 27-08-2010 CrysAlis171 .NET)
(compiled Aug 27 2010,11:50:40)
; 
_computing_data_reduction         
;
CrysAlisPro, Oxford Diffraction Ltd.,
Version 1.171.34.40 (release 27-08-2010 CrysAlis171 .NET)
(compiled Aug 27 2010,11:50:40)
; 
_computing_structure_solution     'SHELXS-97 (Sheldrick, 1990)' 
_computing_structure_refinement   'SHELXL-97 (Sheldrick, 1997)' 
_computing_molecular_graphics     ? 
_computing_publication_material   ? 
 
_refine_special_details 
; 
 Refinement of F^2^ against ALL reflections.  The weighted R-factor wR and 
 goodness of fit S are based on F^2^, conventional R-factors R are based 
 on F, with F set to zero for negative F^2^. The threshold expression of 
 F^2^ > 2sigma(F^2^) is used only for calculating R-factors(gt) etc. and is 
 not relevant to the choice of reflections for refinement.  R-factors based 
 on F^2^ are statistically about twice as large as those based on F, and R- 
 factors based on ALL data will be even larger. 
; 
 
_refine_ls_structure_factor_coef  Fsqd  
_refine_ls_matrix_type            full 
_refine_ls_weighting_scheme       calc  
_refine_ls_weighting_details 
 'calc w=1/[\s^2^(Fo^2^)+(0.1353P)^2^+0.0000P] where P=(Fo^2^+2Fc^2^)/3' 
_atom_sites_solution_primary      direct 
_atom_sites_solution_secondary    difmap 
_atom_sites_solution_hydrogens    geom 
_refine_ls_hydrogen_treatment     constr 
_refine_ls_extinction_method      none 
_refine_ls_extinction_coef        ? 
_refine_ls_abs_structure_details 
 'Flack H D (1983), Acta Cryst. A39, 876-881' 
_refine_ls_abs_structure_Flack    0.039(17) 
_refine_ls_number_reflns          8650 
_refine_ls_number_parameters      696 
_refine_ls_number_restraints      25 
_refine_ls_R_factor_all           0.0762 
_refine_ls_R_factor_gt            0.0650 
_refine_ls_wR_factor_ref          0.1943 
_refine_ls_wR_factor_gt           0.1823 
_refine_ls_goodness_of_fit_ref    1.037 
_refine_ls_restrained_S_all       1.043 
_refine_ls_shift/su_max           0.000 
_refine_ls_shift/su_mean          0.000 
 
loop_ 
 _atom_site_label 
 _atom_site_type_symbol 
 _atom_site_fract_x 
 _atom_site_fract_y 
 _atom_site_fract_z 
 _atom_site_U_iso_or_equiv 
 _atom_site_adp_type 
 _atom_site_occupancy 
 _atom_site_symmetry_multiplicity 
 _atom_site_calc_flag 
 _atom_site_refinement_flags 
 _atom_site_disorder_assembly 
 _atom_site_disorder_group 
Ni1 Ni 1.06100(7) -0.11274(6) 0.09712(4) 0.0381(2) Uani 1 1 d . . . 
Ni2 Ni 0.77925(8) 0.29386(7) 0.61647(5) 0.0465(3) Uani 1 1 d . . . 
O1 O 1.1557(7) -0.1950(6) 0.0098(4) 0.0568(16) Uani 1 1 d . . . 
O2 O 1.3433(11) -0.1883(8) -0.0985(5) 0.090(2) Uani 1 1 d . . . 
O3 O 0.7028(8) 0.3357(7) 0.7214(4) 0.0681(18) Uani 1 1 d . . . 
O4 O 0.4873(13) 0.3439(15) 0.8162(6) 0.146(5) Uani 1 1 d . . . 
O5 O 0.6577(15) 0.7502(8) 0.6652(6) 0.133(4) Uani 1 1 d . . . 
H5A H 0.6758 0.8147 0.6814 0.200 Uiso 1 1 d R . . 
H5B H 0.7451 0.7361 0.6341 0.200 Uiso 1 1 d R . . 
O6 O 0.5266(9) 0.9341(6) 0.7440(4) 0.0842(19) Uani 1 1 d . . . 
H6A H 0.4703 0.9010 0.7157 0.126 Uiso 1 1 d R . . 
H6B H 0.4601 0.9391 0.7875 0.126 Uiso 1 1 d R . . 
O7 O 0.3485(15) 0.6622(12) 0.6639(8) 0.156(4) Uani 1 1 d U . . 
H7A H 0.3033 0.6107 0.7108 0.233 Uiso 1 1 d R . . 
H7B H 0.4367 0.6941 0.6749 0.233 Uiso 1 1 d R . . 
O8 O 0.9498(12) 0.7731(10) 0.5306(5) 0.118(3) Uani 1 1 d . . . 
H8A H 0.9629 0.6919 0.5575 0.177 Uiso 1 1 d R . . 
H8B H 0.8625 0.7797 0.5049 0.177 Uiso 1 1 d R . . 
O9 O 0.8416(14) 0.5431(8) 0.7622(6) 0.130(4) Uani 1 1 d . . . 
H9A H 0.8220 0.4712 0.7545 0.195 Uiso 1 1 d R . . 
H9B H 0.7683 0.5989 0.7397 0.195 Uiso 1 1 d R . . 
O10 O 1.1778(17) 0.5162(14) 0.8064(8) 0.174(5) Uani 1 1 d U . . 
H10A H 1.0698 0.5263 0.8103 0.261 Uiso 1 1 d R . . 
H10B H 1.1975 0.4401 0.8394 0.261 Uiso 1 1 d R . . 
O11 O 0.5725(17) 0.4154(12) 1.1682(8) 0.178(5) Uani 1 1 d U . . 
H11A H 0.5246 0.4473 1.1237 0.267 Uiso 1 1 d R . . 
H11B H 0.6492 0.4672 1.1688 0.267 Uiso 1 1 d R . . 
N1 N 1.3108(8) -0.0292(7) 0.0618(4) 0.0474(16) Uani 1 1 d . . . 
H1 H 1.3770 -0.0840 0.0973 0.057 Uiso 1 1 calc R . . 
N2 N 0.8855(8) 0.1055(7) 0.6670(5) 0.0530(17) Uani 1 1 d . . . 
N3 N 0.8893(8) 0.2511(7) 0.5140(4) 0.0440(15) Uani 1 1 d . . . 
N4 N 0.7172(8) 0.4576(7) 0.5181(4) 0.0486(16) Uani 1 1 d . . . 
N5 N 0.5248(7) 0.2235(6) 0.6416(3) 0.0355(13) Uani 1 1 d . . . 
H5 H 0.5322 0.1376 0.6689 0.043 Uiso 1 1 calc R . . 
N6 N 0.9448(7) 0.0570(5) 0.0286(3) 0.0357(13) Uani 1 1 d . . . 
N7 N 0.9505(8) -0.0435(6) 0.1877(4) 0.0367(14) Uani 1 1 d . . . 
N8 N 1.1373(8) -0.2489(6) 0.2046(4) 0.0437(15) Uani 1 1 d . . . 
N9 N 0.8425(7) -0.2234(7) 0.1123(4) 0.0539(17) Uani 1 1 d D . . 
N10 N 0.7106(7) -0.1984(6) 0.1437(3) 0.0492(14) Uani 1 1 d D . . 
N11 N 0.5778(8) -0.1771(8) 0.1748(4) 0.068(2) Uani 1 1 d D . . 
N12 N 1.0089(11) 0.3668(9) 0.6285(7) 0.091(3) Uani 1 1 d D . . 
N13 N 1.0798(10) 0.4606(8) 0.5947(5) 0.070(2) Uani 1 1 d D . . 
N14 N 1.1590(16) 0.5573(14) 0.5668(10) 0.189(8) Uani 1 1 d D . . 
C1 C 1.2860(11) -0.1497(9) -0.0373(5) 0.053(2) Uani 1 1 d . . . 
C2 C 1.3707(9) -0.0423(8) -0.0229(4) 0.0474(17) Uani 1 1 d . . . 
H2 H 1.3345 0.0366 -0.0636 0.057 Uiso 1 1 calc R . . 
C3 C 1.5564(11) -0.0456(15) -0.0389(6) 0.093(4) Uani 1 1 d . . . 
H3A H 1.6032 -0.0520 0.0117 0.140 Uiso 1 1 calc R . . 
H3B H 1.5948 0.0319 -0.0816 0.140 Uiso 1 1 calc R . . 
H3C H 1.5916 -0.1189 -0.0572 0.140 Uiso 1 1 calc R . . 
C4 C 1.3487(11) 0.1023(10) 0.0643(6) 0.068(2) Uani 1 1 d . . . 
H4A H 1.3006 0.1663 0.0190 0.082 Uiso 1 1 calc R . . 
H4B H 1.4695 0.1139 0.0550 0.082 Uiso 1 1 calc R . . 
C5 C 1.2815(11) 0.1248(11) 0.1457(7) 0.075(3) Uani 1 1 d . . . 
C6 C 1.3166(11) 0.0483(11) 0.2220(6) 0.069(2) Uani 1 1 d . . . 
H6 H 1.3835 -0.0249 0.2257 0.082 Uiso 1 1 calc R . . 
C7 C 1.2519(9) 0.0786(10) 0.2972(6) 0.067(2) Uani 1 1 d . . . 
H7 H 1.2785 0.0246 0.3485 0.080 Uiso 1 1 calc R . . 
C8 C 1.1858(14) 0.2361(10) 0.1422(6) 0.083(3) Uani 1 1 d . . . 
H8 H 1.1639 0.2924 0.0906 0.100 Uiso 1 1 calc R . . 
C9 C 1.1206(14) 0.2641(10) 0.2187(7) 0.086(3) Uani 1 1 d . . . 
H9 H 1.0553 0.3379 0.2158 0.103 Uiso 1 1 calc R . . 
C10 C 1.1533(10) 0.1838(9) 0.2952(6) 0.061(2) Uani 1 1 d . . . 
C11 C 1.0663(9) 0.2064(8) 0.3731(6) 0.0526(19) Uani 1 1 d . . . 
C12 C 1.0754(11) 0.1234(9) 0.4533(6) 0.062(2) Uani 1 1 d . . . 
H12 H 1.1442 0.0505 0.4607 0.074 Uiso 1 1 calc R . . 
C13 C 0.9852(9) 0.1466(8) 0.5219(6) 0.0475(18) Uani 1 1 d . . . 
C14 C 0.9824(10) 0.0672(8) 0.6105(6) 0.054(2) Uani 1 1 d . . . 
C15 C 1.0768(12) -0.0524(10) 0.6357(7) 0.074(3) Uani 1 1 d . . . 
H15 H 1.1396 -0.0846 0.5961 0.088 Uiso 1 1 calc R . . 
C16 C 1.0706(15) -0.1176(10) 0.7209(8) 0.090(3) Uani 1 1 d . . . 
H16 H 1.1360 -0.1912 0.7398 0.109 Uiso 1 1 calc R . . 
C17 C 0.9675(13) -0.0720(10) 0.7763(6) 0.073(3) Uani 1 1 d . . . 
H17 H 0.9561 -0.1183 0.8330 0.088 Uiso 1 1 calc R . . 
C18 C 0.8796(11) 0.0425(8) 0.7489(6) 0.060(2) Uani 1 1 d . . . 
H18 H 0.8159 0.0759 0.7876 0.072 Uiso 1 1 calc R . . 
C19 C 0.9701(10) 0.3213(9) 0.3645(6) 0.061(2) Uani 1 1 d . . . 
H19 H 0.9664 0.3833 0.3127 0.074 Uiso 1 1 calc R . . 
C20 C 0.8795(9) 0.3375(8) 0.4388(5) 0.0507(19) Uani 1 1 d . . . 
C21 C 0.7728(9) 0.4538(8) 0.4429(5) 0.0487(19) Uani 1 1 d . . . 
C22 C 0.7283(10) 0.5472(9) 0.3704(6) 0.065(2) Uani 1 1 d . . . 
H22 H 0.7666 0.5417 0.3172 0.078 Uiso 1 1 calc R . . 
C23 C 0.6246(12) 0.6481(8) 0.3815(6) 0.067(2) Uani 1 1 d . . . 
H23 H 0.5937 0.7128 0.3351 0.080 Uiso 1 1 calc R . . 
C24 C 0.5705(10) 0.6522(8) 0.4568(7) 0.069(3) Uani 1 1 d . . . 
H24 H 0.4996 0.7189 0.4641 0.083 Uiso 1 1 calc R . . 
C25 C 0.6190(11) 0.5565(8) 0.5260(6) 0.056(2) Uani 1 1 d . . . 
H25 H 0.5819 0.5616 0.5793 0.068 Uiso 1 1 calc R . . 
C26 C 0.5427(12) 0.3217(11) 0.7537(7) 0.074(3) Uani 1 1 d . . . 
C27 C 0.4290(9) 0.2812(8) 0.7031(4) 0.0491(18) Uani 1 1 d . . . 
H27 H 0.3760 0.3602 0.6702 0.059 Uiso 1 1 calc R . . 
C28 C 0.2859(12) 0.1979(10) 0.7619(5) 0.070(3) Uani 1 1 d . . . 
H28A H 0.2008 0.1874 0.7295 0.104 Uiso 1 1 calc R . . 
H28B H 0.2379 0.2395 0.8021 0.104 Uiso 1 1 calc R . . 
H28C H 0.3299 0.1148 0.7906 0.104 Uiso 1 1 calc R . . 
C29 C 0.4182(8) 0.2353(8) 0.5733(4) 0.0469(16) Uani 1 1 d . . . 
H29A H 0.3960 0.3260 0.5463 0.056 Uiso 1 1 calc R . . 
H29B H 0.3112 0.1943 0.5979 0.056 Uiso 1 1 calc R . . 
C30 C 0.4971(7) 0.1756(7) 0.5076(4) 0.0380(15) Uani 1 1 d . . . 
C31 C 0.5019(8) 0.2447(7) 0.4243(4) 0.0425(15) Uani 1 1 d . . . 
H31 H 0.4499 0.3253 0.4097 0.051 Uiso 1 1 calc R . . 
C32 C 0.5818(8) 0.1984(7) 0.3613(4) 0.0433(15) Uani 1 1 d . . . 
H32 H 0.5859 0.2495 0.3057 0.052 Uiso 1 1 calc R . . 
C33 C 0.5633(10) 0.0525(8) 0.5256(5) 0.0527(19) Uani 1 1 d . . . 
H33 H 0.5537 0.0002 0.5810 0.063 Uiso 1 1 calc R . . 
C34 C 0.6436(10) 0.0041(7) 0.4638(4) 0.0465(16) Uani 1 1 d . . . 
H34 H 0.6902 -0.0785 0.4785 0.056 Uiso 1 1 calc R . . 
C35 C 0.6551(8) 0.0773(7) 0.3803(4) 0.0388(14) Uani 1 1 d . . . 
C36 C 0.7539(7) 0.0332(6) 0.3119(4) 0.0343(14) Uani 1 1 d . . . 
C37 C 0.7499(8) 0.0970(6) 0.2285(4) 0.0388(15) Uani 1 1 d . . . 
H37 H 0.6787 0.1681 0.2133 0.047 Uiso 1 1 calc R . . 
C38 C 0.8465(8) 0.0601(7) 0.1669(4) 0.0352(15) Uani 1 1 d . . . 
C39 C 0.8532(9) 0.1228(7) 0.0768(4) 0.0384(15) Uani 1 1 d . . . 
C40 C 0.7719(11) 0.2376(8) 0.0438(5) 0.059(2) Uani 1 1 d . . . 
H40 H 0.7041 0.2777 0.0777 0.070 Uiso 1 1 calc R . . 
C41 C 0.7973(13) 0.2927(9) -0.0461(6) 0.072(3) Uani 1 1 d . . . 
H41 H 0.7553 0.3746 -0.0713 0.087 Uiso 1 1 calc R . . 
C42 C 0.8823(11) 0.2250(8) -0.0939(5) 0.055(2) Uani 1 1 d . . . 
H42 H 0.8887 0.2559 -0.1520 0.067 Uiso 1 1 calc R . . 
C43 C 0.9583(9) 0.1112(8) -0.0558(4) 0.0491(19) Uani 1 1 d . . . 
H43 H 1.0225 0.0687 -0.0893 0.059 Uiso 1 1 calc R . . 
C44 C 0.8611(8) -0.0767(6) 0.3311(4) 0.0348(14) Uani 1 1 d . . . 
H44 H 0.8683 -0.1244 0.3867 0.042 Uiso 1 1 calc R . . 
C45 C 0.9538(8) -0.1126(7) 0.2679(5) 0.0378(15) Uani 1 1 d . . . 
C46 C 1.0700(8) -0.2281(7) 0.2779(5) 0.0413(16) Uani 1 1 d . . . 
C47 C 1.1056(9) -0.3055(7) 0.3559(5) 0.0503(18) Uani 1 1 d . . . 
H47 H 1.0645 -0.2878 0.4052 0.060 Uiso 1 1 calc R . . 
C48 C 1.2106(10) -0.4149(8) 0.3546(5) 0.061(2) Uani 1 1 d . . . 
H48 H 1.2315 -0.4747 0.4052 0.073 Uiso 1 1 calc R . . 
C49 C 1.2784(11) -0.4336(8) 0.2841(6) 0.058(2) Uani 1 1 d . . . 
H49 H 1.3534 -0.5016 0.2847 0.070 Uiso 1 1 calc R . . 
C50 C 1.2363(9) -0.3498(8) 0.2084(5) 0.0485(19) Uani 1 1 d . . . 
H50 H 1.2798 -0.3659 0.1588 0.058 Uiso 1 1 calc R . . 
 
loop_ 
 _atom_site_aniso_label 
 _atom_site_aniso_U_11 
 _atom_site_aniso_U_22 
 _atom_site_aniso_U_33 
 _atom_site_aniso_U_23 
 _atom_site_aniso_U_13 
 _atom_site_aniso_U_12 
Ni1 0.0320(4) 0.0453(5) 0.0365(4) -0.0134(4) -0.0014(3) 0.0044(4) 
Ni2 0.0382(5) 0.0460(5) 0.0601(6) -0.0214(5) -0.0131(4) 0.0069(4) 
O1 0.051(3) 0.067(4) 0.059(4) -0.036(3) 0.010(3) -0.006(3) 
O2 0.105(6) 0.089(5) 0.085(5) -0.054(4) 0.033(4) -0.018(4) 
O3 0.064(4) 0.083(4) 0.076(4) -0.044(4) -0.030(3) 0.012(3) 
O4 0.110(7) 0.279(15) 0.103(6) -0.141(9) -0.007(5) 0.014(8) 
O5 0.216(11) 0.088(6) 0.097(6) -0.029(5) -0.032(6) 0.033(6) 
O6 0.105(5) 0.082(4) 0.060(4) -0.018(3) 0.005(3) -0.005(4) 
O7 0.130(6) 0.162(8) 0.177(8) -0.072(7) 0.014(6) 0.026(6) 
O8 0.140(8) 0.133(7) 0.087(5) -0.042(5) -0.025(5) 0.023(6) 
O9 0.208(11) 0.082(5) 0.117(7) -0.031(5) -0.067(7) -0.027(6) 
O10 0.164(8) 0.190(9) 0.183(8) -0.077(7) -0.028(7) 0.008(7) 
O11 0.183(8) 0.151(8) 0.177(8) -0.042(7) 0.021(7) 0.033(7) 
N1 0.036(3) 0.062(4) 0.038(3) -0.011(3) 0.006(3) -0.005(3) 
N2 0.050(4) 0.051(4) 0.071(4) -0.034(3) -0.017(3) 0.002(3) 
N3 0.031(3) 0.043(3) 0.057(4) -0.015(3) 0.000(3) 0.000(3) 
N4 0.041(3) 0.048(4) 0.054(4) -0.011(3) -0.007(3) -0.002(3) 
N5 0.038(3) 0.044(3) 0.030(3) -0.019(3) -0.007(2) 0.008(3) 
N6 0.035(3) 0.040(3) 0.030(3) -0.010(2) -0.004(2) 0.005(2) 
N7 0.034(3) 0.042(3) 0.033(3) -0.010(3) -0.003(2) -0.006(3) 
N8 0.038(3) 0.045(3) 0.048(4) -0.013(3) -0.003(3) 0.003(3) 
N9 0.037(4) 0.068(4) 0.064(4) -0.031(4) -0.005(3) -0.001(3) 
N10 0.048(4) 0.061(4) 0.041(3) -0.017(3) -0.008(3) -0.005(3) 
N11 0.044(4) 0.108(6) 0.055(4) -0.035(4) 0.002(3) 0.001(4) 
N12 0.062(5) 0.074(6) 0.149(9) -0.037(6) -0.043(5) -0.007(4) 
N13 0.058(5) 0.091(6) 0.061(4) -0.023(4) -0.019(4) 0.014(4) 
N14 0.092(8) 0.187(15) 0.198(14) 0.086(12) -0.029(9) -0.045(9) 
C1 0.062(5) 0.062(5) 0.036(4) -0.018(4) -0.001(4) 0.010(4) 
C2 0.041(4) 0.061(4) 0.035(3) -0.012(3) 0.003(3) 0.008(3) 
C3 0.043(5) 0.184(13) 0.057(5) -0.050(7) 0.017(4) -0.023(6) 
C4 0.059(5) 0.084(6) 0.071(5) -0.042(5) 0.014(4) -0.026(4) 
C5 0.049(5) 0.092(7) 0.092(7) -0.048(6) 0.024(5) -0.037(5) 
C6 0.042(4) 0.091(7) 0.074(6) -0.033(5) 0.005(4) 0.007(4) 
C7 0.036(4) 0.107(7) 0.080(6) -0.062(6) -0.001(4) 0.001(4) 
C8 0.099(8) 0.076(6) 0.071(6) -0.028(5) 0.018(5) -0.015(6) 
C9 0.100(8) 0.067(6) 0.090(7) -0.032(6) 0.007(6) 0.001(5) 
C10 0.046(4) 0.079(6) 0.065(5) -0.032(5) -0.005(4) -0.022(4) 
C11 0.030(3) 0.060(5) 0.079(6) -0.038(4) -0.003(3) -0.004(3) 
C12 0.045(4) 0.068(6) 0.073(6) -0.025(5) -0.003(4) 0.000(4) 
C13 0.031(3) 0.046(4) 0.071(5) -0.027(4) -0.006(3) 0.001(3) 
C14 0.047(4) 0.052(5) 0.072(5) -0.029(4) -0.023(4) 0.014(4) 
C15 0.071(6) 0.074(6) 0.090(7) -0.043(6) -0.020(5) 0.022(5) 
C16 0.091(7) 0.055(6) 0.117(9) -0.014(6) -0.025(7) 0.027(5) 
C17 0.087(7) 0.066(6) 0.066(6) -0.016(5) -0.027(5) 0.026(5) 
C18 0.064(5) 0.053(5) 0.066(6) -0.019(4) -0.016(4) 0.007(4) 
C19 0.041(4) 0.059(5) 0.073(5) -0.010(4) 0.008(4) -0.006(4) 
C20 0.031(4) 0.063(5) 0.059(5) -0.023(4) 0.002(3) -0.001(3) 
C21 0.035(4) 0.048(4) 0.060(5) -0.012(4) -0.002(3) -0.009(3) 
C22 0.050(5) 0.076(6) 0.059(5) -0.006(5) -0.005(4) -0.011(4) 
C23 0.060(5) 0.050(5) 0.076(6) 0.000(5) -0.007(4) -0.005(4) 
C24 0.040(4) 0.042(4) 0.111(8) -0.004(5) -0.008(4) 0.007(3) 
C25 0.053(5) 0.045(4) 0.073(6) -0.023(4) -0.007(4) 0.006(4) 
C26 0.059(6) 0.107(8) 0.073(6) -0.053(6) -0.022(5) 0.025(6) 
C27 0.050(4) 0.063(5) 0.036(4) -0.019(3) -0.009(3) 0.017(4) 
C28 0.064(6) 0.091(7) 0.040(4) -0.007(4) 0.005(4) 0.014(5) 
C29 0.044(4) 0.066(4) 0.038(3) -0.027(3) -0.007(3) 0.010(3) 
C30 0.025(3) 0.048(4) 0.040(3) -0.015(3) -0.004(2) 0.008(3) 
C31 0.043(3) 0.044(4) 0.042(4) -0.015(3) -0.010(3) 0.007(3) 
C32 0.047(4) 0.047(4) 0.032(3) -0.008(3) -0.003(3) 0.006(3) 
C33 0.070(5) 0.047(4) 0.038(4) -0.011(3) 0.001(3) -0.005(4) 
C34 0.068(5) 0.034(3) 0.036(3) -0.010(3) -0.001(3) -0.005(3) 
C35 0.035(3) 0.052(4) 0.034(3) -0.020(3) 0.002(3) -0.008(3) 
C36 0.025(3) 0.033(3) 0.045(4) -0.013(3) -0.005(3) -0.001(3) 
C37 0.039(3) 0.036(3) 0.043(4) -0.015(3) -0.004(3) 0.002(3) 
C38 0.029(3) 0.037(3) 0.038(3) -0.008(3) -0.008(3) 0.003(3) 
C39 0.035(3) 0.038(4) 0.038(3) -0.006(3) -0.006(3) 0.000(3) 
C40 0.067(5) 0.060(5) 0.050(4) -0.018(4) -0.012(4) 0.016(4) 
C41 0.089(7) 0.062(5) 0.055(5) -0.004(4) -0.016(5) 0.024(5) 
C42 0.064(5) 0.061(5) 0.033(4) -0.002(4) -0.005(3) 0.005(4) 
C43 0.049(4) 0.066(5) 0.029(3) -0.011(3) -0.005(3) 0.014(4) 
C44 0.035(3) 0.038(3) 0.026(3) -0.002(3) -0.006(2) 0.000(3) 
C45 0.026(3) 0.039(4) 0.044(4) -0.005(3) -0.007(3) 0.003(3) 
C46 0.029(3) 0.047(4) 0.047(4) -0.012(3) -0.005(3) 0.003(3) 
C47 0.048(4) 0.051(4) 0.047(4) -0.007(3) -0.011(3) 0.008(3) 
C48 0.049(4) 0.052(5) 0.066(5) 0.006(4) -0.013(4) 0.012(4) 
C49 0.059(5) 0.042(4) 0.072(6) -0.017(4) -0.010(4) 0.014(4) 
C50 0.035(4) 0.053(4) 0.060(5) -0.024(4) -0.004(3) 0.011(3) 
 
_geom_special_details 
; 
 All esds (except the esd in the dihedral angle between two l.s. planes) 
 are estimated using the full covariance matrix.  The cell esds are taken 
 into account individually in the estimation of esds in distances, angles 
 and torsion angles; correlations between esds in cell parameters are only 
 used when they are defined by crystal symmetry.  An approximate (isotropic) 
 treatment of cell esds is used for estimating esds involving l.s. planes. 
; 
 
loop_ 
 _geom_bond_atom_site_label_1 
 _geom_bond_atom_site_label_2 
 _geom_bond_distance 
 _geom_bond_site_symmetry_2 
 _geom_bond_publ_flag 
Ni1 N7 1.999(7) . ? 
Ni1 O1 2.005(6) . ? 
Ni1 N8 2.100(6) . ? 
Ni1 N6 2.102(5) . ? 
Ni1 N9 2.122(7) . ? 
Ni1 N1 2.178(7) . ? 
Ni2 O3 1.979(7) . ? 
Ni2 N3 2.014(7) . ? 
Ni2 N12 2.102(8) . ? 
Ni2 N4 2.119(7) . ? 
Ni2 N2 2.145(7) . ? 
Ni2 N5 2.161(6) . ? 
O1 C1 1.251(10) . ? 
O2 C1 1.259(10) . ? 
O3 C26 1.326(12) . ? 
O4 C26 1.182(12) . ? 
O5 H5A 0.8543 . ? 
O5 H5B 0.8578 . ? 
O6 H6A 0.8617 . ? 
O6 H6B 0.8645 . ? 
O7 H7A 0.8641 . ? 
O7 H7B 0.8687 . ? 
O8 H8A 0.8694 . ? 
O8 H8B 0.8602 . ? 
O9 H9A 0.8582 . ? 
O9 H9B 0.8608 . ? 
O10 H10A 0.8645 . ? 
O10 H10B 0.8654 . ? 
O11 H11A 0.8572 . ? 
O11 H11B 0.8584 . ? 
N1 C4 1.495(11) . ? 
N1 C2 1.498(9) . ? 
N1 H1 0.9100 . ? 
N2 C14 1.309(11) . ? 
N2 C18 1.337(11) . ? 
N3 C13 1.324(10) . ? 
N3 C20 1.337(11) . ? 
N4 C21 1.304(11) . ? 
N4 C25 1.333(11) . ? 
N5 C27 1.488(9) . ? 
N5 C29 1.496(8) . ? 
N5 H5 0.9100 . ? 
N6 C43 1.357(9) . ? 
N6 C39 1.369(9) . ? 
N7 C45 1.335(9) . ? 
N7 C38 1.353(9) . ? 
N8 C50 1.315(10) . ? 
N8 C46 1.367(10) . ? 
N9 N10 1.180(7) . ? 
N10 N11 1.171(7) . ? 
N12 N13 1.145(8) . ? 
N13 N14 1.191(9) . ? 
C1 C2 1.480(12) . ? 
C2 C3 1.480(11) . ? 
C2 H2 0.9800 . ? 
C3 H3A 0.9600 . ? 
C3 H3B 0.9600 . ? 
C3 H3C 0.9600 . ? 
C4 C5 1.500(12) . ? 
C4 H4A 0.9700 . ? 
C4 H4B 0.9700 . ? 
C5 C6 1.358(15) . ? 
C5 C8 1.393(15) . ? 
C6 C7 1.436(12) . ? 
C6 H6 0.9300 . ? 
C7 C10 1.355(13) . ? 
C7 H7 0.9300 . ? 
C8 C9 1.446(14) . ? 
C8 H8 0.9300 . ? 
C9 C10 1.368(14) . ? 
C9 H9 0.9300 . ? 
C10 C11 1.492(12) . ? 
C11 C12 1.386(13) . ? 
C11 C19 1.417(11) . ? 
C12 C13 1.370(12) . ? 
C12 H12 0.9300 . ? 
C13 C14 1.478(12) . ? 
C14 C15 1.448(12) . ? 
C15 C16 1.391(15) . ? 
C15 H15 0.9300 . ? 
C16 C17 1.361(15) . ? 
C16 H16 0.9300 . ? 
C17 C18 1.382(13) . ? 
C17 H17 0.9300 . ? 
C18 H18 0.9300 . ? 
C19 C20 1.423(12) . ? 
C19 H19 0.9300 . ? 
C20 C21 1.508(11) . ? 
C21 C22 1.404(12) . ? 
C22 C23 1.391(14) . ? 
C22 H22 0.9300 . ? 
C23 C24 1.303(14) . ? 
C23 H23 0.9300 . ? 
C24 C25 1.390(13) . ? 
C24 H24 0.9300 . ? 
C25 H25 0.9300 . ? 
C26 C27 1.495(12) . ? 
C27 C28 1.544(12) . ? 
C27 H27 0.9800 . ? 
C28 H28A 0.9600 . ? 
C28 H28B 0.9600 . ? 
C28 H28C 0.9600 . ? 
C29 C30 1.510(9) . ? 
C29 H29A 0.9700 . ? 
C29 H29B 0.9700 . ? 
C30 C31 1.373(9) . ? 
C30 C33 1.375(10) . ? 
C31 C32 1.387(9) . ? 
C31 H31 0.9300 . ? 
C32 C35 1.380(10) . ? 
C32 H32 0.9300 . ? 
C33 C34 1.385(10) . ? 
C33 H33 0.9300 . ? 
C34 C35 1.384(9) . ? 
C34 H34 0.9300 . ? 
C35 C36 1.504(9) . ? 
C36 C37 1.369(9) . ? 
C36 C44 1.418(9) . ? 
C37 C38 1.366(10) . ? 
C37 H37 0.9300 . ? 
C38 C39 1.458(9) . ? 
C39 C40 1.373(11) . ? 
C40 C41 1.442(12) . ? 
C40 H40 0.9300 . ? 
C41 C42 1.355(13) . ? 
C41 H41 0.9300 . ? 
C42 C43 1.363(11) . ? 
C42 H42 0.9300 . ? 
C43 H43 0.9300 . ? 
C44 C45 1.369(10) . ? 
C44 H44 0.9300 . ? 
C45 C46 1.508(9) . ? 
C46 C47 1.384(10) . ? 
C47 C48 1.429(11) . ? 
C47 H47 0.9300 . ? 
C48 C49 1.314(12) . ? 
C48 H48 0.9300 . ? 
C49 C50 1.394(12) . ? 
C49 H49 0.9300 . ? 
C50 H50 0.9300 . ? 
 
loop_ 
 _geom_angle_atom_site_label_1 
 _geom_angle_atom_site_label_2 
 _geom_angle_atom_site_label_3 
 _geom_angle 
 _geom_angle_site_symmetry_1 
 _geom_angle_site_symmetry_3 
 _geom_angle_publ_flag 
N7 Ni1 O1 174.7(3) . . ? 
N7 Ni1 N8 78.5(2) . . ? 
O1 Ni1 N8 100.0(3) . . ? 
N7 Ni1 N6 77.8(2) . . ? 
O1 Ni1 N6 103.8(2) . . ? 
N8 Ni1 N6 156.2(2) . . ? 
N7 Ni1 N9 88.2(3) . . ? 
O1 Ni1 N9 86.7(2) . . ? 
N8 Ni1 N9 88.9(3) . . ? 
N6 Ni1 N9 92.4(2) . . ? 
N7 Ni1 N1 106.1(3) . . ? 
O1 Ni1 N1 78.9(3) . . ? 
N8 Ni1 N1 91.5(2) . . ? 
N6 Ni1 N1 93.1(2) . . ? 
N9 Ni1 N1 165.5(2) . . ? 
O3 Ni2 N3 172.1(3) . . ? 
O3 Ni2 N12 83.3(4) . . ? 
N3 Ni2 N12 89.3(4) . . ? 
O3 Ni2 N4 105.6(3) . . ? 
N3 Ni2 N4 77.8(3) . . ? 
N12 Ni2 N4 95.2(3) . . ? 
O3 Ni2 N2 100.0(3) . . ? 
N3 Ni2 N2 76.6(3) . . ? 
N12 Ni2 N2 86.6(3) . . ? 
N4 Ni2 N2 154.3(3) . . ? 
O3 Ni2 N5 79.7(2) . . ? 
N3 Ni2 N5 107.5(2) . . ? 
N12 Ni2 N5 162.7(3) . . ? 
N4 Ni2 N5 92.3(2) . . ? 
N2 Ni2 N5 93.4(2) . . ? 
C1 O1 Ni1 119.0(6) . . ? 
C26 O3 Ni2 120.1(6) . . ? 
H5A O5 H5B 109.0 . . ? 
H6A O6 H6B 107.3 . . ? 
H7A O7 H7B 106.5 . . ? 
H8A O8 H8B 107.3 . . ? 
H9A O9 H9B 108.2 . . ? 
H10A O10 H10B 106.6 . . ? 
H11A O11 H11B 109.0 . . ? 
C4 N1 C2 110.3(6) . . ? 
C4 N1 Ni1 123.2(5) . . ? 
C2 N1 Ni1 106.2(5) . . ? 
C4 N1 H1 105.2 . . ? 
C2 N1 H1 105.2 . . ? 
Ni1 N1 H1 105.2 . . ? 
C14 N2 C18 122.0(8) . . ? 
C14 N2 Ni2 112.7(6) . . ? 
C18 N2 Ni2 124.3(6) . . ? 
C13 N3 C20 120.7(8) . . ? 
C13 N3 Ni2 120.3(6) . . ? 
C20 N3 Ni2 118.5(6) . . ? 
C21 N4 C25 118.4(7) . . ? 
C21 N4 Ni2 114.9(5) . . ? 
C25 N4 Ni2 126.5(6) . . ? 
C27 N5 C29 107.7(5) . . ? 
C27 N5 Ni2 108.4(4) . . ? 
C29 N5 Ni2 122.3(4) . . ? 
C27 N5 H5 105.8 . . ? 
C29 N5 H5 105.8 . . ? 
Ni2 N5 H5 105.8 . . ? 
C43 N6 C39 117.4(6) . . ? 
C43 N6 Ni1 128.1(5) . . ? 
C39 N6 Ni1 114.4(4) . . ? 
C45 N7 C38 120.3(7) . . ? 
C45 N7 Ni1 119.8(5) . . ? 
C38 N7 Ni1 118.7(5) . . ? 
C50 N8 C46 118.4(7) . . ? 
C50 N8 Ni1 127.8(6) . . ? 
C46 N8 Ni1 113.9(5) . . ? 
N10 N9 Ni1 123.3(6) . . ? 
N11 N10 N9 178.0(8) . . ? 
N13 N12 Ni2 133.8(8) . . ? 
N12 N13 N14 173.6(12) . . ? 
O1 C1 O2 122.3(9) . . ? 
O1 C1 C2 118.6(7) . . ? 
O2 C1 C2 119.0(8) . . ? 
C1 C2 C3 114.7(8) . . ? 
C1 C2 N1 111.3(6) . . ? 
C3 C2 N1 112.0(6) . . ? 
C1 C2 H2 106.0 . . ? 
C3 C2 H2 106.0 . . ? 
N1 C2 H2 106.0 . . ? 
C2 C3 H3A 109.5 . . ? 
C2 C3 H3B 109.5 . . ? 
H3A C3 H3B 109.5 . . ? 
C2 C3 H3C 109.5 . . ? 
H3A C3 H3C 109.5 . . ? 
H3B C3 H3C 109.5 . . ? 
N1 C4 C5 113.0(7) . . ? 
N1 C4 H4A 109.0 . . ? 
C5 C4 H4A 109.0 . . ? 
N1 C4 H4B 109.0 . . ? 
C5 C4 H4B 109.0 . . ? 
H4A C4 H4B 107.8 . . ? 
C6 C5 C8 118.1(10) . . ? 
C6 C5 C4 124.3(10) . . ? 
C8 C5 C4 117.5(10) . . ? 
C5 C6 C7 121.0(9) . . ? 
C5 C6 H6 119.5 . . ? 
C7 C6 H6 119.5 . . ? 
C10 C7 C6 121.7(9) . . ? 
C10 C7 H7 119.1 . . ? 
C6 C7 H7 119.1 . . ? 
C5 C8 C9 119.9(10) . . ? 
C5 C8 H8 120.1 . . ? 
C9 C8 H8 120.1 . . ? 
C10 C9 C8 121.2(9) . . ? 
C10 C9 H9 119.4 . . ? 
C8 C9 H9 119.4 . . ? 
C7 C10 C9 118.0(9) . . ? 
C7 C10 C11 122.1(9) . . ? 
C9 C10 C11 119.6(9) . . ? 
C12 C11 C19 117.9(8) . . ? 
C12 C11 C10 124.4(8) . . ? 
C19 C11 C10 117.7(8) . . ? 
C13 C12 C11 121.4(8) . . ? 
C13 C12 H12 119.3 . . ? 
C11 C12 H12 119.3 . . ? 
N3 C13 C12 121.0(9) . . ? 
N3 C13 C14 111.7(7) . . ? 
C12 C13 C14 127.2(8) . . ? 
N2 C14 C15 119.7(9) . . ? 
N2 C14 C13 117.8(7) . . ? 
C15 C14 C13 122.4(8) . . ? 
C16 C15 C14 117.9(9) . . ? 
C16 C15 H15 121.0 . . ? 
C14 C15 H15 121.0 . . ? 
C17 C16 C15 119.0(9) . . ? 
C17 C16 H16 120.5 . . ? 
C15 C16 H16 120.5 . . ? 
C16 C17 C18 120.5(10) . . ? 
C16 C17 H17 119.8 . . ? 
C18 C17 H17 119.8 . . ? 
N2 C18 C17 120.5(9) . . ? 
N2 C18 H18 119.8 . . ? 
C17 C18 H18 119.8 . . ? 
C11 C19 C20 117.0(8) . . ? 
C11 C19 H19 121.5 . . ? 
C20 C19 H19 121.5 . . ? 
N3 C20 C19 121.8(8) . . ? 
N3 C20 C21 113.1(7) . . ? 
C19 C20 C21 125.0(8) . . ? 
N4 C21 C22 122.5(8) . . ? 
N4 C21 C20 115.5(7) . . ? 
C22 C21 C20 121.9(8) . . ? 
C23 C22 C21 117.2(9) . . ? 
C23 C22 H22 121.4 . . ? 
C21 C22 H22 121.4 . . ? 
C24 C23 C22 120.1(9) . . ? 
C24 C23 H23 119.9 . . ? 
C22 C23 H23 119.9 . . ? 
C23 C24 C25 119.8(9) . . ? 
C23 C24 H24 120.1 . . ? 
C25 C24 H24 120.1 . . ? 
N4 C25 C24 122.0(9) . . ? 
N4 C25 H25 119.0 . . ? 
C24 C25 H25 119.0 . . ? 
O4 C26 O3 124.2(10) . . ? 
O4 C26 C27 120.3(10) . . ? 
O3 C26 C27 115.5(8) . . ? 
N5 C27 C26 111.7(6) . . ? 
N5 C27 C28 115.5(7) . . ? 
C26 C27 C28 109.8(7) . . ? 
N5 C27 H27 106.4 . . ? 
C26 C27 H27 106.4 . . ? 
C28 C27 H27 106.4 . . ? 
C27 C28 H28A 109.5 . . ? 
C27 C28 H28B 109.5 . . ? 
H28A C28 H28B 109.5 . . ? 
C27 C28 H28C 109.5 . . ? 
H28A C28 H28C 109.5 . . ? 
H28B C28 H28C 109.5 . . ? 
N5 C29 C30 113.6(5) . . ? 
N5 C29 H29A 108.8 . . ? 
C30 C29 H29A 108.8 . . ? 
N5 C29 H29B 108.8 . . ? 
C30 C29 H29B 108.8 . . ? 
H29A C29 H29B 107.7 . . ? 
C31 C30 C33 116.4(6) . . ? 
C31 C30 C29 119.5(6) . . ? 
C33 C30 C29 124.0(6) . . ? 
C30 C31 C32 122.3(6) . . ? 
C30 C31 H31 118.9 . . ? 
C32 C31 H31 118.9 . . ? 
C35 C32 C31 120.6(6) . . ? 
C35 C32 H32 119.7 . . ? 
C31 C32 H32 119.7 . . ? 
C30 C33 C34 122.1(7) . . ? 
C30 C33 H33 118.9 . . ? 
C34 C33 H33 118.9 . . ? 
C35 C34 C33 120.7(7) . . ? 
C35 C34 H34 119.6 . . ? 
C33 C34 H34 119.6 . . ? 
C32 C35 C34 117.6(6) . . ? 
C32 C35 C36 119.8(6) . . ? 
C34 C35 C36 122.4(6) . . ? 
C37 C36 C44 116.1(6) . . ? 
C37 C36 C35 122.9(6) . . ? 
C44 C36 C35 121.0(6) . . ? 
C38 C37 C36 122.5(6) . . ? 
C38 C37 H37 118.8 . . ? 
C36 C37 H37 118.8 . . ? 
N7 C38 C37 119.7(6) . . ? 
N7 C38 C39 113.7(6) . . ? 
C37 C38 C39 126.5(6) . . ? 
N6 C39 C40 123.2(7) . . ? 
N6 C39 C38 114.5(6) . . ? 
C40 C39 C38 122.3(7) . . ? 
C39 C40 C41 116.5(7) . . ? 
C39 C40 H40 121.8 . . ? 
C41 C40 H40 121.8 . . ? 
C42 C41 C40 120.0(8) . . ? 
C42 C41 H41 120.0 . . ? 
C40 C41 H41 120.0 . . ? 
C41 C42 C43 119.3(7) . . ? 
C41 C42 H42 120.4 . . ? 
C43 C42 H42 120.4 . . ? 
N6 C43 C42 123.3(7) . . ? 
N6 C43 H43 118.4 . . ? 
C42 C43 H43 118.4 . . ? 
C45 C44 C36 119.9(6) . . ? 
C45 C44 H44 120.0 . . ? 
C36 C44 H44 120.0 . . ? 
N7 C45 C44 121.3(6) . . ? 
N7 C45 C46 112.4(7) . . ? 
C44 C45 C46 126.3(6) . . ? 
N8 C46 C47 123.2(7) . . ? 
N8 C46 C45 114.8(6) . . ? 
C47 C46 C45 122.0(7) . . ? 
C46 C47 C48 114.9(7) . . ? 
C46 C47 H47 122.6 . . ? 
C48 C47 H47 122.6 . . ? 
C49 C48 C47 121.9(7) . . ? 
C49 C48 H48 119.0 . . ? 
C47 C48 H48 119.0 . . ? 
C48 C49 C50 119.0(7) . . ? 
C48 C49 H49 120.5 . . ? 
C50 C49 H49 120.5 . . ? 
N8 C50 C49 122.4(8) . . ? 
N8 C50 H50 118.8 . . ? 
C49 C50 H50 118.8 . . ? 
 
loop_ 
 _geom_torsion_atom_site_label_1 
 _geom_torsion_atom_site_label_2 
 _geom_torsion_atom_site_label_3 
 _geom_torsion_atom_site_label_4 
 _geom_torsion 
 _geom_torsion_site_symmetry_1 
 _geom_torsion_site_symmetry_2 
 _geom_torsion_site_symmetry_3 
 _geom_torsion_site_symmetry_4 
 _geom_torsion_publ_flag 
N8 Ni1 O1 C1 -104.2(6) . . . . ? 
N6 Ni1 O1 C1 75.9(6) . . . . ? 
N9 Ni1 O1 C1 167.6(7) . . . . ? 
N1 Ni1 O1 C1 -14.6(6) . . . . ? 
N12 Ni2 O3 C26 174.9(8) . . . . ? 
N4 Ni2 O3 C26 81.4(8) . . . . ? 
N2 Ni2 O3 C26 -99.8(8) . . . . ? 
N5 Ni2 O3 C26 -8.1(7) . . . . ? 
N7 Ni1 N1 C4 -32.6(7) . . . . ? 
O1 Ni1 N1 C4 149.1(7) . . . . ? 
N8 Ni1 N1 C4 -111.0(7) . . . . ? 
N6 Ni1 N1 C4 45.6(7) . . . . ? 
N9 Ni1 N1 C4 157.8(10) . . . . ? 
N7 Ni1 N1 C2 -161.0(5) . . . . ? 
O1 Ni1 N1 C2 20.6(5) . . . . ? 
N8 Ni1 N1 C2 120.6(5) . . . . ? 
N6 Ni1 N1 C2 -82.8(5) . . . . ? 
N9 Ni1 N1 C2 29.3(14) . . . . ? 
O3 Ni2 N2 C14 -164.3(6) . . . . ? 
N3 Ni2 N2 C14 8.4(6) . . . . ? 
N12 Ni2 N2 C14 -81.7(6) . . . . ? 
N4 Ni2 N2 C14 13.2(10) . . . . ? 
N5 Ni2 N2 C14 115.6(6) . . . . ? 
O3 Ni2 N2 C18 4.5(7) . . . . ? 
N3 Ni2 N2 C18 177.2(7) . . . . ? 
N12 Ni2 N2 C18 87.1(7) . . . . ? 
N4 Ni2 N2 C18 -178.0(6) . . . . ? 
N5 Ni2 N2 C18 -75.6(7) . . . . ? 
N12 Ni2 N3 C13 78.9(6) . . . . ? 
N4 Ni2 N3 C13 174.4(6) . . . . ? 
N2 Ni2 N3 C13 -7.8(6) . . . . ? 
N5 Ni2 N3 C13 -97.1(6) . . . . ? 
N12 Ni2 N3 C20 -93.4(6) . . . . ? 
N4 Ni2 N3 C20 2.0(6) . . . . ? 
N2 Ni2 N3 C20 179.9(6) . . . . ? 
N5 Ni2 N3 C20 90.5(6) . . . . ? 
O3 Ni2 N4 C21 173.5(6) . . . . ? 
N3 Ni2 N4 C21 0.9(6) . . . . ? 
N12 Ni2 N4 C21 89.0(6) . . . . ? 
N2 Ni2 N4 C21 -3.9(10) . . . . ? 
N5 Ni2 N4 C21 -106.6(6) . . . . ? 
O3 Ni2 N4 C25 -11.6(8) . . . . ? 
N3 Ni2 N4 C25 175.7(7) . . . . ? 
N12 Ni2 N4 C25 -96.1(7) . . . . ? 
N2 Ni2 N4 C25 171.0(6) . . . . ? 
N5 Ni2 N4 C25 68.3(7) . . . . ? 
O3 Ni2 N5 C27 17.1(4) . . . . ? 
N3 Ni2 N5 C27 -166.3(4) . . . . ? 
N12 Ni2 N5 C27 27.0(12) . . . . ? 
N4 Ni2 N5 C27 -88.4(5) . . . . ? 
N2 Ni2 N5 C27 116.7(5) . . . . ? 
O3 Ni2 N5 C29 143.1(6) . . . . ? 
N3 Ni2 N5 C29 -40.3(6) . . . . ? 
N12 Ni2 N5 C29 153.1(10) . . . . ? 
N4 Ni2 N5 C29 37.6(5) . . . . ? 
N2 Ni2 N5 C29 -117.3(5) . . . . ? 
N7 Ni1 N6 C43 173.6(7) . . . . ? 
O1 Ni1 N6 C43 -11.6(7) . . . . ? 
N8 Ni1 N6 C43 168.5(6) . . . . ? 
N9 Ni1 N6 C43 -98.8(6) . . . . ? 
N1 Ni1 N6 C43 67.8(6) . . . . ? 
N7 Ni1 N6 C39 -2.1(5) . . . . ? 
O1 Ni1 N6 C39 172.7(5) . . . . ? 
N8 Ni1 N6 C39 -7.2(9) . . . . ? 
N9 Ni1 N6 C39 85.5(5) . . . . ? 
N1 Ni1 N6 C39 -107.9(5) . . . . ? 
N8 Ni1 N7 C45 -7.6(5) . . . . ? 
N6 Ni1 N7 C45 174.5(6) . . . . ? 
N9 Ni1 N7 C45 81.7(6) . . . . ? 
N1 Ni1 N7 C45 -95.8(6) . . . . ? 
N8 Ni1 N7 C38 -174.8(6) . . . . ? 
N6 Ni1 N7 C38 7.3(5) . . . . ? 
N9 Ni1 N7 C38 -85.6(5) . . . . ? 
N1 Ni1 N7 C38 97.0(6) . . . . ? 
N7 Ni1 N8 C50 -178.1(7) . . . . ? 
O1 Ni1 N8 C50 7.0(7) . . . . ? 
N6 Ni1 N8 C50 -173.1(6) . . . . ? 
N9 Ni1 N8 C50 93.5(7) . . . . ? 
N1 Ni1 N8 C50 -72.0(7) . . . . ? 
N7 Ni1 N8 C46 3.5(5) . . . . ? 
O1 Ni1 N8 C46 -171.3(5) . . . . ? 
N6 Ni1 N8 C46 8.6(9) . . . . ? 
N9 Ni1 N8 C46 -84.9(5) . . . . ? 
N1 Ni1 N8 C46 109.7(5) . . . . ? 
N7 Ni1 N9 N10 20.6(7) . . . . ? 
O1 Ni1 N9 N10 -160.8(7) . . . . ? 
N8 Ni1 N9 N10 99.1(7) . . . . ? 
N6 Ni1 N9 N10 -57.1(7) . . . . ? 
N1 Ni1 N9 N10 -169.4(9) . . . . ? 
O3 Ni2 N12 N13 -105.7(13) . . . . ? 
N3 Ni2 N12 N13 77.2(13) . . . . ? 
N4 Ni2 N12 N13 -0.5(14) . . . . ? 
N2 Ni2 N12 N13 153.8(13) . . . . ? 
N5 Ni2 N12 N13 -115.6(15) . . . . ? 
Ni1 O1 C1 O2 -173.0(7) . . . . ? 
Ni1 O1 C1 C2 3.8(10) . . . . ? 
O1 C1 C2 C3 144.2(8) . . . . ? 
O2 C1 C2 C3 -38.8(11) . . . . ? 
O1 C1 C2 N1 15.7(10) . . . . ? 
O2 C1 C2 N1 -167.3(8) . . . . ? 
C4 N1 C2 C1 -160.3(7) . . . . ? 
Ni1 N1 C2 C1 -24.6(7) . . . . ? 
C4 N1 C2 C3 69.9(10) . . . . ? 
Ni1 N1 C2 C3 -154.4(8) . . . . ? 
C2 N1 C4 C5 176.2(7) . . . . ? 
Ni1 N1 C4 C5 49.5(10) . . . . ? 
N1 C4 C5 C6 55.1(12) . . . . ? 
N1 C4 C5 C8 -129.2(9) . . . . ? 
C8 C5 C6 C7 2.2(13) . . . . ? 
C4 C5 C6 C7 177.9(8) . . . . ? 
C5 C6 C7 C10 0.3(13) . . . . ? 
C6 C5 C8 C9 -2.8(14) . . . . ? 
C4 C5 C8 C9 -178.8(8) . . . . ? 
C5 C8 C9 C10 1.0(15) . . . . ? 
C6 C7 C10 C9 -2.1(12) . . . . ? 
C6 C7 C10 C11 171.3(7) . . . . ? 
C8 C9 C10 C7 1.5(14) . . . . ? 
C8 C9 C10 C11 -172.2(8) . . . . ? 
C7 C10 C11 C12 -0.9(12) . . . . ? 
C9 C10 C11 C12 172.5(9) . . . . ? 
C7 C10 C11 C19 178.1(7) . . . . ? 
C9 C10 C11 C19 -8.5(11) . . . . ? 
C19 C11 C12 C13 4.5(12) . . . . ? 
C10 C11 C12 C13 -176.5(7) . . . . ? 
C20 N3 C13 C12 -0.7(12) . . . . ? 
Ni2 N3 C13 C12 -172.9(6) . . . . ? 
C20 N3 C13 C14 177.8(7) . . . . ? 
Ni2 N3 C13 C14 5.7(9) . . . . ? 
C11 C12 C13 N3 -1.8(13) . . . . ? 
C11 C12 C13 C14 179.9(8) . . . . ? 
C18 N2 C14 C15 4.9(13) . . . . ? 
Ni2 N2 C14 C15 174.1(7) . . . . ? 
C18 N2 C14 C13 -177.5(7) . . . . ? 
Ni2 N2 C14 C13 -8.4(9) . . . . ? 
N3 C13 C14 N2 2.4(11) . . . . ? 
C12 C13 C14 N2 -179.2(8) . . . . ? 
N3 C13 C14 C15 179.9(8) . . . . ? 
C12 C13 C14 C15 -1.7(13) . . . . ? 
N2 C14 C15 C16 -4.9(14) . . . . ? 
C13 C14 C15 C16 177.7(9) . . . . ? 
C14 C15 C16 C17 4.8(16) . . . . ? 
C15 C16 C17 C18 -4.7(17) . . . . ? 
C14 N2 C18 C17 -4.8(13) . . . . ? 
Ni2 N2 C18 C17 -172.6(7) . . . . ? 
C16 C17 C18 N2 4.6(16) . . . . ? 
C12 C11 C19 C20 -4.8(11) . . . . ? 
C10 C11 C19 C20 176.2(7) . . . . ? 
C13 N3 C20 C19 0.2(12) . . . . ? 
Ni2 N3 C20 C19 172.5(6) . . . . ? 
C13 N3 C20 C21 -176.5(7) . . . . ? 
Ni2 N3 C20 C21 -4.2(9) . . . . ? 
C11 C19 C20 N3 2.6(12) . . . . ? 
C11 C19 C20 C21 178.9(7) . . . . ? 
C25 N4 C21 C22 -2.3(12) . . . . ? 
Ni2 N4 C21 C22 172.9(6) . . . . ? 
C25 N4 C21 C20 -178.5(7) . . . . ? 
Ni2 N4 C21 C20 -3.3(8) . . . . ? 
N3 C20 C21 N4 4.9(10) . . . . ? 
C19 C20 C21 N4 -171.7(8) . . . . ? 
N3 C20 C21 C22 -171.4(7) . . . . ? 
C19 C20 C21 C22 12.1(12) . . . . ? 
N4 C21 C22 C23 1.8(12) . . . . ? 
C20 C21 C22 C23 177.8(8) . . . . ? 
C21 C22 C23 C24 -1.1(13) . . . . ? 
C22 C23 C24 C25 1.1(14) . . . . ? 
C21 N4 C25 C24 2.2(13) . . . . ? 
Ni2 N4 C25 C24 -172.5(6) . . . . ? 
C23 C24 C25 N4 -1.6(14) . . . . ? 
Ni2 O3 C26 O4 179.5(12) . . . . ? 
Ni2 O3 C26 C27 -3.5(12) . . . . ? 
C29 N5 C27 C26 -157.5(7) . . . . ? 
Ni2 N5 C27 C26 -23.4(8) . . . . ? 
C29 N5 C27 C28 76.1(8) . . . . ? 
Ni2 N5 C27 C28 -149.7(5) . . . . ? 
O4 C26 C27 N5 -164.1(12) . . . . ? 
O3 C26 C27 N5 18.8(12) . . . . ? 
O4 C26 C27 C28 -34.6(15) . . . . ? 
O3 C26 C27 C28 148.3(9) . . . . ? 
C27 N5 C29 C30 -177.7(6) . . . . ? 
Ni2 N5 C29 C30 56.0(8) . . . . ? 
N5 C29 C30 C31 -131.2(7) . . . . ? 
N5 C29 C30 C33 50.2(10) . . . . ? 
C33 C30 C31 C32 -5.4(10) . . . . ? 
C29 C30 C31 C32 175.9(6) . . . . ? 
C30 C31 C32 C35 2.4(10) . . . . ? 
C31 C30 C33 C34 5.4(11) . . . . ? 
C29 C30 C33 C34 -176.0(7) . . . . ? 
C30 C33 C34 C35 -2.3(12) . . . . ? 
C31 C32 C35 C34 1.0(10) . . . . ? 
C31 C32 C35 C36 -174.8(6) . . . . ? 
C33 C34 C35 C32 -1.0(10) . . . . ? 
C33 C34 C35 C36 174.6(7) . . . . ? 
C32 C35 C36 C37 -12.6(9) . . . . ? 
C34 C35 C36 C37 171.9(7) . . . . ? 
C32 C35 C36 C44 165.7(6) . . . . ? 
C34 C35 C36 C44 -9.8(9) . . . . ? 
C44 C36 C37 C38 -1.8(10) . . . . ? 
C35 C36 C37 C38 176.6(6) . . . . ? 
C45 N7 C38 C37 2.8(10) . . . . ? 
Ni1 N7 C38 C37 170.0(5) . . . . ? 
C45 N7 C38 C39 -178.0(6) . . . . ? 
Ni1 N7 C38 C39 -10.9(8) . . . . ? 
C36 C37 C38 N7 0.2(11) . . . . ? 
C36 C37 C38 C39 -178.8(7) . . . . ? 
C43 N6 C39 C40 1.9(11) . . . . ? 
Ni1 N6 C39 C40 178.1(6) . . . . ? 
C43 N6 C39 C38 -179.0(6) . . . . ? 
Ni1 N6 C39 C38 -2.8(7) . . . . ? 
N7 C38 C39 N6 8.6(9) . . . . ? 
C37 C38 C39 N6 -172.3(7) . . . . ? 
N7 C38 C39 C40 -172.3(7) . . . . ? 
C37 C38 C39 C40 6.8(11) . . . . ? 
N6 C39 C40 C41 -4.5(12) . . . . ? 
C38 C39 C40 C41 176.5(8) . . . . ? 
C39 C40 C41 C42 7.0(14) . . . . ? 
C40 C41 C42 C43 -6.9(15) . . . . ? 
C39 N6 C43 C42 -1.6(11) . . . . ? 
Ni1 N6 C43 C42 -177.3(6) . . . . ? 
C41 C42 C43 N6 4.3(13) . . . . ? 
C37 C36 C44 C45 0.5(9) . . . . ? 
C35 C36 C44 C45 -177.9(6) . . . . ? 
C38 N7 C45 C44 -4.1(10) . . . . ? 
Ni1 N7 C45 C44 -171.1(5) . . . . ? 
C38 N7 C45 C46 176.7(6) . . . . ? 
Ni1 N7 C45 C46 9.7(8) . . . . ? 
C36 C44 C45 N7 2.4(10) . . . . ? 
C36 C44 C45 C46 -178.5(6) . . . . ? 
C50 N8 C46 C47 2.3(11) . . . . ? 
Ni1 N8 C46 C47 -179.1(6) . . . . ? 
C50 N8 C46 C45 -178.2(6) . . . . ? 
Ni1 N8 C46 C45 0.3(8) . . . . ? 
N7 C45 C46 N8 -6.1(9) . . . . ? 
C44 C45 C46 N8 174.7(7) . . . . ? 
N7 C45 C46 C47 173.3(7) . . . . ? 
C44 C45 C46 C47 -5.8(11) . . . . ? 
N8 C46 C47 C48 -3.9(11) . . . . ? 
C45 C46 C47 C48 176.7(7) . . . . ? 
C46 C47 C48 C49 5.3(12) . . . . ? 
C47 C48 C49 C50 -5.1(13) . . . . ? 
C46 N8 C50 C49 -1.9(12) . . . . ? 
Ni1 N8 C50 C49 179.8(6) . . . . ? 
C48 C49 C50 N8 3.4(13) . . . . ? 
 
loop_ 
 _geom_hbond_atom_site_label_D 
 _geom_hbond_atom_site_label_H 
 _geom_hbond_atom_site_label_A 
 _geom_hbond_distance_DH 
 _geom_hbond_distance_HA 
 _geom_hbond_distance_DA 
 _geom_hbond_angle_DHA 
 _geom_hbond_site_symmetry_A 
O5 H5A O6  0.85 2.15 2.824(11) 135.8 . 
O5 H5B O8  0.86 2.19 3.011(14) 159.2 . 
O7 H7B O5  0.87 1.88 2.710(17) 160.4 . 
O9 H9B O5  0.86 1.99 2.824(13) 163.3 . 
O9 H9A O3  0.86 2.05 2.872(10) 160.0 . 
O10 H10A O9  0.86 2.08 2.869(18) 152.1 . 
O8 H8A N14  0.87 2.09 2.777(18) 136.0 . 
N5 H5 O6  0.91 2.19 3.095(9) 173.7 1_545 
N1 H1 N11  0.91 2.22 3.107(10) 166.3 1_655 
O7 H7A O10  0.86 1.83 2.684(19) 171.1 1_455 
O6 H6B O2  0.86 2.13 2.831(9) 138.1 1_466 
 
_diffrn_measured_fraction_theta_max    0.997 
_diffrn_reflns_theta_full              25.50 
_diffrn_measured_fraction_theta_full   0.997 
_refine_diff_density_max    1.180 
_refine_diff_density_min   -0.458 
_refine_diff_density_rms    0.091 
